# Supplementary material for: A Genetic Screening Strategy Identifies Novel Regulators of the Proteostasis Network
Source: PLoS Genet. 2011 Dec 29;7(12):e1002438. doi: 10.1371/journal.pgen.1002438 (PMC3248563; doi:10.1371/journal.pgen.1002438)
Supplement: Table S1 — Exhaustive list and description of all RNAi targeted genes that suppressed Q35 aggregation. (XLS) [file pgen.1002438.s004.xls]

## Sheet: Table S1
Table S1: Exhaustive list and description of all RNAi targeted genes that suppress Q35 aggregation.
ORF	Gene	Functional Class	Molecular function	Description(1)	Human ortholog	Mount (2)	Efficacy(3)	Phenotype(4)	Toxicity(5)	Delayed onset(6)	Suppression with RNAi @ L4(7)	Q37	SOD1G93A	unc-15(e1402)	unc-54(e1157)	unc-52(e669su250)	unc-45(e286)
T05G5.3	cdk-1	CC/DSR	Cell Cycle	Cyclin-dependent kinase 1. Required for cell-cycle progression through M phase.	CDC2	11	++	STE		1 day	ü	ü	ü
F18H3.5	cdk-4	CC/DSR	Cell Cycle	Cyclin-dependent serine/threonine protein kinase. Progression through G1 phase.	CDK4, CDK6	12	+
F45C12.5	fbxb-11	CC/DSR	DNA recombination	Membrane transposase with a cyclin-like F-box. Protein-protein interactions.	DYNC2H1	12	++			1 day		ü
F58E1.5	fbxb-17	CC/DSR	DNA recombination	Transposase with a cyclin-like F-box.	SIPA1L1	12	++		0			ü	ü
W03D2.2	fbxb-55	CC/DSR	DNA recombination	Transposase with a cyclin-like F-box.	None	0	++
C03C10.3	rnr-2	CC/DSR	DNA replication	Mitochondrial ribonucleoside-diphosphate reductase beta chain (oxidoreductase).	RRM2B	7	++	STE		1 day		ü	ü
F46F11.9	F46F11.9	CC/DSR	Meiosis	Predicted to have a role in meiosis and intracellular transport.	KIAA1012	2	++		-	1 day	ü	ü	ü
Y17G7B.5	mcm-2	CC/DSR	Replication	Minichromosome maintenance protein 2, DNA replication licensing factor.	None	11	++	STE		1 day	ü	ü
F18A1.5	rpa-1	CC/DSR	Replication	Single-stranded DNA-binding replication protein A (RPA) large subunit.	RPA1	11	++	GRO			ü	ü	ü
C27H6.2	ruvb-1	CC/DSR	Replication	RuvB-like protein 1 DNA helicase.	RUVBL1	5	++		+	1 day		ü	ü
C37C3.6	ppn-1	CS, PT	Cellular matrix	Multidomain glycoprotein orthologous to PaPiliN from D. melanogaster.	ADAMTS6	6	++	GRO			ü	ü	ü
K08E5.3	mua-3	CS, PT	Cellular processes	Transmembrane cell adhesion receptor precursor. Muscle Attachment Abnormal fibrillin.	None	0, 14	+
W10G6.3	mua-6	CS, PT	Cellular processes	Muscle Attachment Abnormal protein 6. Intermediate filament protein (MUA-6/IFA-2).	LMNB2	14	+
F54B11.3	unc-84	CS, PT	Cellular processes	Spindle pole body protein.	UNC84A	5	++
C01H6.1	col-61	CS, PT	Cuticle	Collagen protein 61, structural constituent of the cuticle.	COL4A5	16	++	GRO	0			ü	ü
K01A2.7	col-69	CS, PT	Cuticle	Collagen protein 69, structural constituent of the cuticle.	COL4A5	1	++				ü	ü	ü
C10H11.1	viln-1	CS, PT	Cytoskeleton	Actin regulatory protein supervillin. Meiotic chromosome segregation.	SVIL	11	++	GRO	+			ü
Y66H1B.2	Y66H1B.2	CS, PT	Cytoskeleton	Filamin, actin-binding cytoskeleton protein.	None	1	++	GRO
F25H8.3	gon-1	CS, PT	Morphogenesis	Metalloprotease, sub-family of secreted proteases, developmental glycoprotein.	ADAMTS9	1	+	STE
M01E11.6	klp-15	CS, PT	Vesicle trafficking	Kinesin-like protein 15 (KAR3 subfamily). Motor protein, interacts with tubulin, collagen.	KIFC3	7	++	EGL	-			ü	ü
ZC155.1	nex-1	CS, PT	Vesicle trafficking	Annexin family protein 1, calcium-dependent phospholipid binding protein.	ANXA13, ANX13	8	+		+		ü	ü	ü
C50D2.2	C50D2.2	EM	Amino acids metabolism	Amino acid transporter, amino acid permease.	SLC7A4	14	++			1 day		ü	ü
R03D7.1	R03D7.1	EM	Amino acids metabolism	5-methyltetrahydrofolate-homocysteine methyltransferase. Amino acids biosynthesis.	MTR	20	++					ü	ü
C34B2.8	C34B2.8	EM	Electron transport chain	NADH:ubiquinone oxidoreductase, Complex I B16.6 subunit.	NDUFA13	23	+		0			ü	ü
F37C12.3	F37C12.3	EM	Electron transport chain	NADH-ubiquinone dehydrogenase, complex I. Acyl-carrier protein.	NDUFAB1	2	+
F55H2.5	F55H2.5	EM	Electron transport chain	Cytochrome b, complex III (Cytochrome b-561).	CYB561	2	++
F59C6.5	F59C6.5	EM	Electron transport chain	NADH ubiquinone oxidoreductase, Complex I.	NDUFB10	2	++	GRO	+	1 day		ü	ü
T24C4.1	ucr-2.3	EM	Electron transport chain	Ubiquinol-cytochrome C reductase core subunit 2.	UQCRC2	7	++	STE	-	1 day	ü	ü	ü		ü	ü	ü
ZK809.3	ZK809.3	EM	Electron transport chain	NADH dehydrogenase (ubiquinone) 1 beta subcomplex 6.	NDUFB6	23	+
C47F8.4	C47F8.4	EM	Glycan metabolism	Beta-1,3-glucuronyltransferase B3GAT1/SQV-8.	B3GAT1	0	++	GRO		1 day		ü	ü
C54C8.5	C54C8.5	EM	Glycan metabolism	Beta-1,3-glucuronyltransferase B3GAT1/SQV-9.	B3GAT2	0	++	GRO	0	1 day		ü	ü
D2030.1	D2030.1	EM	Glycan metabolism	Mannosyl-oligosaccharide alpha-1,2-mannosidase/ glycosyl hydrolase.	MAN1A1	11	++	STE	0	1 day		ü
F23B12.5	F23B12.5	EM	Glycan metabolism	Pyruvate dehydrogenase E2 component (Dihydrolipoamide acetyltransferase).	DLAT	20	+			1 day			ü
B0281.5	B0281.5	EM	Ion transport	Polymerase delta-interacting protein PDIP1. Voltage-gated potassium channel complex.	KCTD10	12	++				ü	ü	ü
C01G12.8	catp-4	EM	Ion transport	Na+/K+-exchanging ATPase, alpha subunit.	ATP1A2, MHP2	4	++		0			ü
C34C12.6	C34C12.6	EM	Lipid metabolism	Phosphatidylinositol transfer protein SEC14.	SEC14L4	14	+
F11E6.5	elo-2	EM	Lipid metabolism	Palmitic acid elongase, long-chain fatty acids elongase.	ELOVL3	19	++		0			ü
F43E2.7	F43E2.7	EM	Mitochondrial function	Mitochondrial carrier protein.	MTCH2	4	++			1 day	ü	ü	ü
W06H3.3	W06H3.3	EM	Pyrimidines metabolism	CTP synthase, EC 6.3.4.2 (UTP-ammonia lyase).	CTPS2	1	++			1 day	ü	ü	ü
K06G5.2	cyp-13B2	EM	Redox	Cytochrome P450 family.	CYP3A4	12	+		-	1 day		ü	ü
K05D4.4	cyp-33D1	EM	Redox	Cytochrome P450 family.	CYP2J2	13	++		+		ü	ü
T26C5.1	gst-13	EM	Redox	Glutathione S-transferase.	PGDS	19	+
Y46E12A.3	Y46E12A.3	EM	Redox	Glutaredoxin-related protein, ribosomal_L23 Glutaredoxin.	LOC389207	0	+
C47A10.1	pgp-9	EM	Secondary metabolism	P-Glycoprotein related 9, multidrug resistance protein, ABC transporter family.	ABCB1, PGY1, MDR1, CLCS	27	+
F43G9.1	F43G9.1	EM	TCA cycle	Mitochondrial Isocitrate dehydrogenase, alpha subunit.	IDH3A	1	++	GRO	-	1 day		ü	ü	ü			ü
H14A12.2	fum-1	EM	TCA cycle	Fumarase protein 1. Carbohydrate metabolism; tricarboxylic acid cycle.	FH	2, 7	+
B0432.4	misc-1	EM	TCA cycle	Mitochondrial 2-oxoglutarate/malate carrier protein.	SLC25A11, SLC20A4	30	+
T22B11.5	T22B11.5	EM	TCA cycle	2-oxoglutarate dehydrogenase, E1 subunit.	OGDHL	27	++	GRO			ü	ü	ü	ü	ü	ü	ü
F08H9.3	F08H9.3	PFT	Chaperone	Heat shock protein, alpha crystallins of the HSP16 class.	CRYAB	15	++					ü
F19H8.1	tps-2	PFT	Chaperone activity	Trehalose-6-phosphate synthase. Glycosyltransferase.	None	1, 14	+
T01B7.4	cyn-11	PFT	Cyclophilin	Cyclophilin D isoform, peptidyl-prolyl cis-trans isomerase/PPIase.	PPIH	18	++		0			ü	ü
C34D4.12	cyn-12	PFT	Cyclophilin	Cyclophilin protein, peptidylprolyl isomerase.	PPIL1	2	++	GRO		1 day		ü	ü
C04A2.7	dnj-5	PFT	HSP70 co-chaperone	Dnaj domain protein 5 (contains one J domain).	DNAJC14	11	+
C30C11.4	C30C11.4	PFT	HSP70 superfamily	Member of the Hsp70 family of heat shock proteins.	HSPA4L	5	+			1 day		ü
T23B12.7	dnj-22	PFT	Mitochondrial chaperone	Dnaj domain protein 22. Predicted to be mitochondrial.	DNAJC17	7	+		+			ü	ü
T24H7.1	phb-2	PFT	Mitochondrial chaperone	Mitochondrial prohibitin complex protein 2.	PHB2	20	++		+			ü	ü
F07E5.5	F07E5.5	PFT	Post-translation modification	E3 ubiquitin ligase interacting with arginine methyltransferase. Zinc finger protein.	ZCCHC9		+
K12C11.2	smo-1	PFT	Post-translation modification	SUMO (ubiquitin-related) homolog. Ubiquitin-like protein.	SUMO1, UBL1	2	+
C42C1.5	tag-335	PFT	Protein glycosylation	Mannose-1-phosphate guanylyltransferase.	GMPPB	5	++	STE		1 day	ü	ü	ü
C26E6.6	C26E6.6	PS	Mitochondrial ribosome	Mitochondrial ribosomal protein L3.	MRPL3, RPML3	2	+	STE		1 day		ü	ü
F33D4.5	F33D4.5	PS	Mitochondrial ribosome	Mitochondrial 50S ribosomal protein L1.	MRPL1	2	++		0	1 day		ü
B0432.3	mrpl-41	PS	Mitochondrial ribosome	39S ribosomal protein L41, mitochondrial.	MRPL41	2	++			1 day	ü	ü	ü
T23B12.2	T23B12.2	PS	Mitochondrial ribosome	Mitochondrial ribosomal protein L4.	MRPL4		+
B0511.8	tag-264	PS	Mitochondrial ribosome	28S ribosomal protein S30, mitochondrial	MRPS30, PDCD9		+
B0250.1	rpl-2	PS	Ribosomal protein	60S Ribosomal protein, large subunit L8.	RPL8	23	++	GRO				ü
B0336.10	rpl-23	PS	Ribosomal protein	60S Ribosomal protein, large subunit L23.	RPL23	23	+	GRO
ZK652.4	rpl-35	PS	Ribosomal protein	60S ribosomal protein L35.	RPL35	23	++	GRO	-		ü	ü		ü		ü
Y24D9A.4	rpl-7A	PS	Ribosomal protein	60S ribosomal protein, large subunit 7A, isoform c.	RPL7A	23	+
F37C12.11	rps-21	PS	Ribosomal protein	40S ribosomal protein, small subunit S21.	RPS21	23	++				ü	ü	ü
F40F8.10	rps-9	PS	Ribosomal protein	40S ribosomal protein, small subunit S9e.	RPS9	23	+	GRO
Y73B3A.18	Y73B3A.18	PS	Ribosomal protein	putative 60S ribosomal protein L7A.	RPL7A		+
F56D1.7	daz-1	PS	Translation	Daz protein 1. Translation regulation of specific mRNAs.	DAZ3	7	++			1 day	ü		ü
T02G5.9	krs-1	PS	Translation	Lysyl (K) tRNA Synthetase, class II - protein biosynthesis.	KARS	20	++			1 day		ü	ü
F17C11.9	F17C11.9	PS	Translation elongation factor	Translation elongation factor, EF-1 gamma subunit.	EEF1G	23	++	GRO		1 day		ü	ü
H19N07.1	H19N07.1	PS	Translation factor	Peptide chain release factor eRF subunit 2.	GSPT2	20	++				ü	ü
Y54E2A.11	eif-3.B	PS	Translation initiation	Eukaryotic initiation factor 3, subunit b (eIF-3b).	None	30	+	GRO		1 day	ü		ü
R05D11.4	R05D11.4	PS	Translation initiation	ATP-dependent RNA helicase.	DDX52	2	++	STE	-	1 day		ü	ü				ü
H12I13.4	fbf-1	PS	Translation repressor	Fem-3 mRNA-binding factor.	Pum1	7	++
C32F10.5	hmg-3	RSP	Nucleososme binding protein	Hmg protein 3 - Nucleosome-binding factor SPN, POB3 subunit.	SSRP1	7	++	GRO	0			ü	ü
T20B12.8	hmg-4	RSP	Nucleososme binding protein	Hmg protein 4 - nucleosome-binding factor SPN, POB3 subunit.	SSRP1	11	++	GRO	0			ü	ü
C15H11.9	C15H11.9	RSP	Ribosome biogenesis	Ribosome biogenesis regulatory protein homolog	RRS1		++			1 day		ü	ü
ZK1127.5	ZK1127.5	RSP	Ribosome biogenesis	RNA 3'-terminal phosphate cyclase-like protein. 40S-ribosomal-subunit biogenesis.	RCL1	20	++
F13H8.2	F13H8.2	RSP	RNA processing	WD40-repeat-containing subunit of the 18S rRNA processing complex, mitochondria.	WDR3	5	++	STE		1 day		ü	ü
T01C3.7	fib-1	RSP	RNA processing	rRNA 2'-O-methyltransferase fibrillarin. Pre-rRNA processing.	FBL	20	++		0	1 day	ü	ü	ü
C16A3.3	let-716	RSP	RNA processing	rRNA processing protein Rrp5.	PDCD11	20	++	GRO		1 day	ü	ü
ZK430.7	ZK430.7	RSP	RNA processing	Sof1-like rRNA ribosomal processing protein.	DCAF13	30	++		-	1 day	ü	ü	ü	ü	ü	ü	ü
D1054.14	D1054.14	RSP	Splicing	Predicted PRP38-like splicing factor.	PRPF38B	2	++
Y110A7A.8	Y110A7A.8	RSP	Splicing	Putative mRNA splicing factor PRP31.	PRPF31, RP11	2	++	EGL	-			ü	ü	ü		ü	ü
C55A6.9	C55A6.9	RSP	Transcription	RNA polymerase II-associated factor 1 homolog.	PAF1	11	++	EGL	0	1 day		ü
K03F8.1	K03F8.1	RSP	Transcription	Putative Reverse Transcriptase.	ZNF521	0	++			1 day		ü
F53A2.5	dro-1	RSP	Transcription factor	DR1 (One) transcription factor family. Class 2 transcription repressor NC2, beta subunit.	DR1	2	+
B0286.5	fkh-6	RSP	Transcription factor	Forkhead transcription factor family protein 6.	FOXI1, FKHL10	8	++	GRO		1 day		ü
F32H2.1	gei-11	RSP	Transcription factor	gei-11 encodes a protein with Myb DNA-binding domains. GEX Interacting protein 11.	SNAPC4, MYB	11	++		-		ü	ü	ü	ü	ü	ü	ü
F57B10.1	let-607	RSP	Transcription factor	CREB - ATF (Activating Transcription Factor) transcriptor factor family.	CREB3		++		-		ü	ü	ü	ü	ü	ü	ü
R10D12.2	dpr-1	RSP	Transcription regulator	Dauer Pheromone Responsive protein 1. Nuclear hormone receptor family.	ESRRB	3	+
C25A1.10	dao-5	S	Insulin receptor signaling	Nucleolar GTPase/ATPase p130.	None	5	++		-	1 day		ü	ü
ZK742.1	xpo-1	S	Nuclear export receptor	Exportin-1, an importin-beta-like protein (Importin beta family protein 4, isoform a).	XPO1	5	++	GRO			ü	ü	ü
C53D5.6	imb-3	S	Nuclear transport factor	Karyopherin (importin) beta 3.Nuclear transport factor.	RANBP5	5	+
C01B12.4	C01B12.4	S	Receptor protein	Organic solute transporter alpha-like protein, glycoprotein receptor, rhodopsin family.	TMEM34	4	+
F02A9.6	glp-1	S	Receptor protein	Germ Line Proliferation protein 1, fibrillin from the LIN-12/Notch family.	NOTCH2		+
F22E5.16	sri-57	S	Receptor protein	Serpentine Receptor Class I. Predicted olfactory G-protein coupled receptor.	TAAR6	3	++		-		ü	ü
Y27F2A.2	sri-78	S	Receptor protein	Serpentine Receptor Class I. 7TM chemoreceptor, sri family.	OR10P1	0	++		-		ü	ü
Y102A5C.23	srz-53	S	Receptor protein	Serpentine Receptor, class Z.	FZD4, EVR1	10	+		-			ü	ü
T10H9.1	T10H9.1	S	Receptor protein	Putative serpentine receptor-like protein.	AGTRL1	9	+		+	1 day			ü
T11F1.6	T11F1.6	S	Receptor protein	Predicted receptor, with receptor-L domain.	INSR	0	++			1 day		ü
T02E9.2	grl-7	S	Secreted molecule	Ground-like protein 7. Intercellular signalling.	None	14	+
C53A5.11	C53A5.11	S	Transduction	Protein containing BTB/POZ and Kelch domains.	IPP	10	+
F36H5.6	clec-19	S	Transduction	C-type lectin protein 19.	MRC1	17	++		0			ü	ü
K07F5.8	K07F5.8	S	Transduction	Protein tyrosine phosphatase (PTPs Family), hydrolase.	PTPN12	4	+
F35C12.2	ncx-4	S	Transduction	Na/Ca exchanger; K+-dependent Ca2+/Na+ exchanger/solute carrier.	SLC24A2	6	+
C27H5.1	pdl-1	S	Transduction	cGMP-phosphodiesterase, delta subunit. Unc-119 family.	PDE6D	6	+				ü	ü	ü
R01H10.7	R01H10.7	S	Transduction	Inositol-polyphosphate 4-phosphatase (DAF-2 signaling).	INPP4B		+
F28B4.2	rgl-1	S	Transduction	Ral GDS-Like protein 1. Positive regulation of growth rate.	RGL1	1	++			1 day		ü
T10H9.2	scd-2	S	Transduction	Protein kinase. Receptor protein tyrosine kinase/ATP binding.	ALK	1	+
W03B1.9	W03B1.9	S	Transduction	Sre G protein-coupled chemoreceptor.	SRRM1	4	++		-			ü	ü
B0207.6	B0207.6	U	Unknown	Predicted GTPase	ATPBD1B		+
C14A4.6	C14A4.6	U	Unknown	Uncharacterized protein	None		+
C23G10.10	C23G10.10	U	Unknown	Uncharacterized protein	None	10	++		+	1 day		ü
C45G3.4	C45G3.4	U	Unknown	Uncharacterized protein	None	0	++		-	1 day		ü	ü				ü
C54E10.1	C54E10.1	U	Unknown	Uncharacterized protein	PFKFB1		+
F14B8.2	F14B8.2	U	Unknown	Uncharacterized protein	None	8	++	GRO	0			ü	ü
F26E4.2	F26E4.2	U	Unknown	Uncharacterized protein	None	6	++	GRO	0	1 day		ü	ü
F31A9.1	F31A9.1	U	Unknown	Uncharacterized protein	None		+		-	1 day
F47F2.3	F47F2.3	U	Unknown	Uncharacterized protein	KRTAP10-1	10	++			1 day		ü
F48A11.2	F48A11.2	U	Unknown	Uncharacterized protein	None		++
F49F1.3	F49F1.3	U	Unknown	Uncharacterized protein	KIAA1856		+
F53A2.1	F53A2.1	U	Unknown	Uncharacterized protein	SORL1		+
F53F10.1	F53F10.1	U	Unknown	Uncharacterized protein	CCDC102A	6	++	GRO	-	1 day		ü	ü
F54C4.3	F54C4.3	U	Unknown	Ortholog to human histidine rich calcium binding protein	HRC	0	++		+	1 day		ü
F57A8.2	F57A8.2	U	Unknown	Predicted membrane protein	YIF1A		++
Y119D3B.22	fbxa-76	U	Unknown	F-box A protein	None	8	++		+			ü
H02I12.1	H02I12.1	U	Unknown	Uncharacterized protein	FBN1		+			1 day	ü		ü
K02E7.11	K02E7.11	U	Unknown	Uncharacterized protein	LAG1	0	++		+	1 day		ü
F18G5.2	pes-8	U	Unknown	Patterned expression site protein 8	TCERG1		+
Y39A1B.2	ptr-19	U	Unknown	PaTched Related family, membrane protein	PTCHD1	10	++		0			ü
R05D7.2	R05D7.2	U	Unknown	Uncharacterized protein	VPS39	4	++	EGL	-	1 day		ü	ü
C53A5.1	ril-1	U	Unknown	RNAi-Induced Longevity	None	23	++	GRO	0			ü	ü
CC4.3	smu-1	U	Unknown	Suppressor of Mec and Unc defects	SMU1	3	++	GRO	0	1 day		ü	ü
T04D3.5	T04D3.5	U	Unknown	Uncharacterized protein	FGD4	12	++		-			ü	ü
T05A10.3	T05A10.3	U	Unknown	Uncharacterized protein	TCHH, THH		++
T07A9.9	T07A9.9	U	Unknown	GTP-binding protein CRFG/NOG1	GTPBP4		+	GRO
T28A8.4	T28A8.4	U	Unknown	Uncharacterized protein	SLK		+
T22D2.1	vab-19	U	Unknown	Ankyrin repeat protein	ANKRD15	1	++			1 day		ü
W03B1.5	W03B1.5	U	Unknown	Uncharacterized protein	B3GAT1	3	++		-			ü	ü
Y37D8A.16	Y37D8A.16	U	Unknown	Uncharacterized protein	GPR111		+
Y43C5A.3	Y43C5A.3	U	Unknown	Uncharacterized protein	HNRPA2B1		+
Y48G8AL.13	Y48G8AL.13	U	Unknown	Uncharacterized protein	None		+
Y51H7BR.3	Y51H7BR.3	U	Unknown	Uncharacterized protein	None	0	++		+	1 day		ü
Y71F9B.15	Y71F9B.15	U	Unknown	Uncharacterized protein	RNF123		+
Y87G2A.1	Y87G2A.1	U	Unknown	Uncharacterized protein	RBM28		+
ZK430.1	ZK430.1	U	Unknown	Uncharacterized protein	HEATR1		+
